# Supplementary material for: Magnetic cobalt–graphene nanocomposite derived from self-assembly of MOFs with graphene oxide as an activator for peroxymonosulfate
Source: Royal Society of Chemistry journal article supplement (doi:10.1039/c4ta06516f), 2015-01-01
Supplement: c4ta06516f1.pdf [file c4ta06516f1.pdf]

# Electronic Supporting Information

for

## Magnetic Cobalt-Graphene Nanocomposite derived from Self- Assembly of MOFs with Graphene Oxide as an Activator for Peroxymonosulfate

*Kun-Yi Andrew Lin\**, *Fu-Kong Hsu*, and *Wei-Der Lee*

<sup>a</sup>Department of Environmental Engineering, National Chung Hsing University, 250 Kuo-Kuang Road, Taichung, Taiwan, R.O.C.

\*Corresponding Author. Tel: +886-4-22854709, E-mail address: [linky@nchu.edu.tw](mailto:linky@nchu.edu.tw)

(Kun-Yi Andrew Lin)

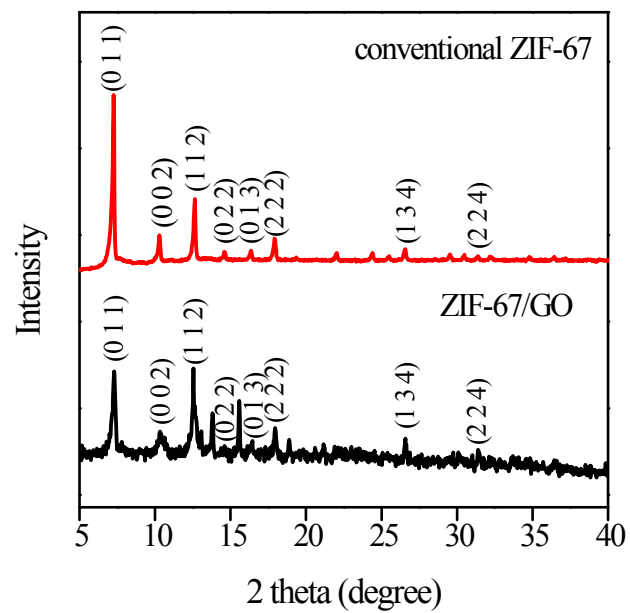

Fig. S1. XRD patterns of the conventional ZIF-67 and the as-prepared ZIF-67/GO composite

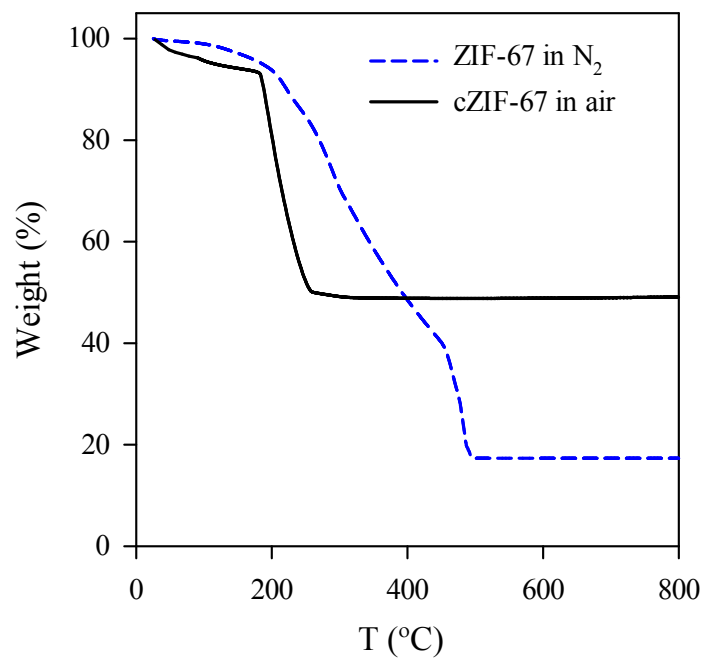

Fig. S2. TG curves of ZIF-67 in N<sub>2</sub> and cZIF-67 in air.

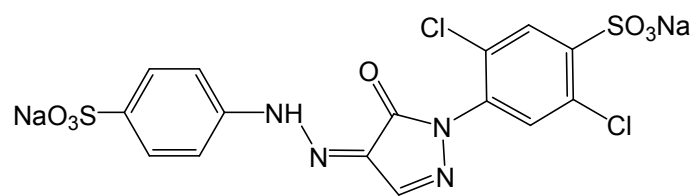

Fig. S3. Chemical structure of Acid yellow 17

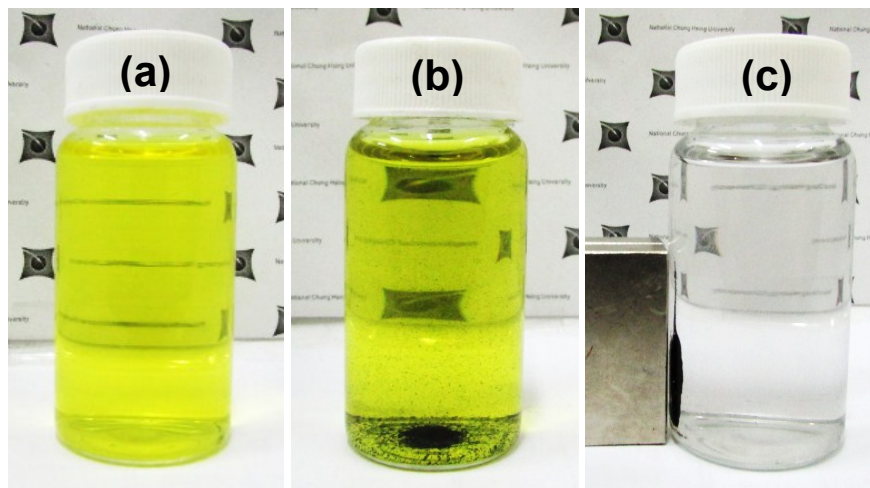

Fig. S4. Degradation of AY by PMS activated using MCG: (a) AY solution ( $50 \text{ mg L}^{-1}$ ) with PMS ( $90 \text{ mg L}^{-1}$ ); (b) MCG ( $500 \text{ mg L}^{-1}$ ) was added to the AY solution with PMS (c) the resulting mixture after 30-min shaking. The solution becomes clear and MCG can be drawn by a magnet (on the left in (c)).

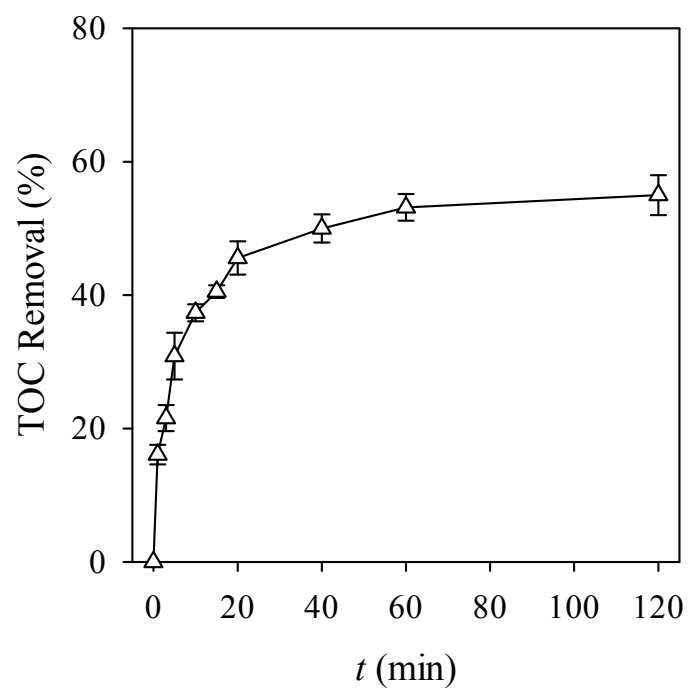

Fig. S5. TOC removal during the decolorization of AY activated by MCG at 25 °C (AY solution = 100 mg L<sup>-1</sup>; PMS = 90 mg L<sup>-1</sup>; MCG = 500 mg L<sup>-1</sup>).

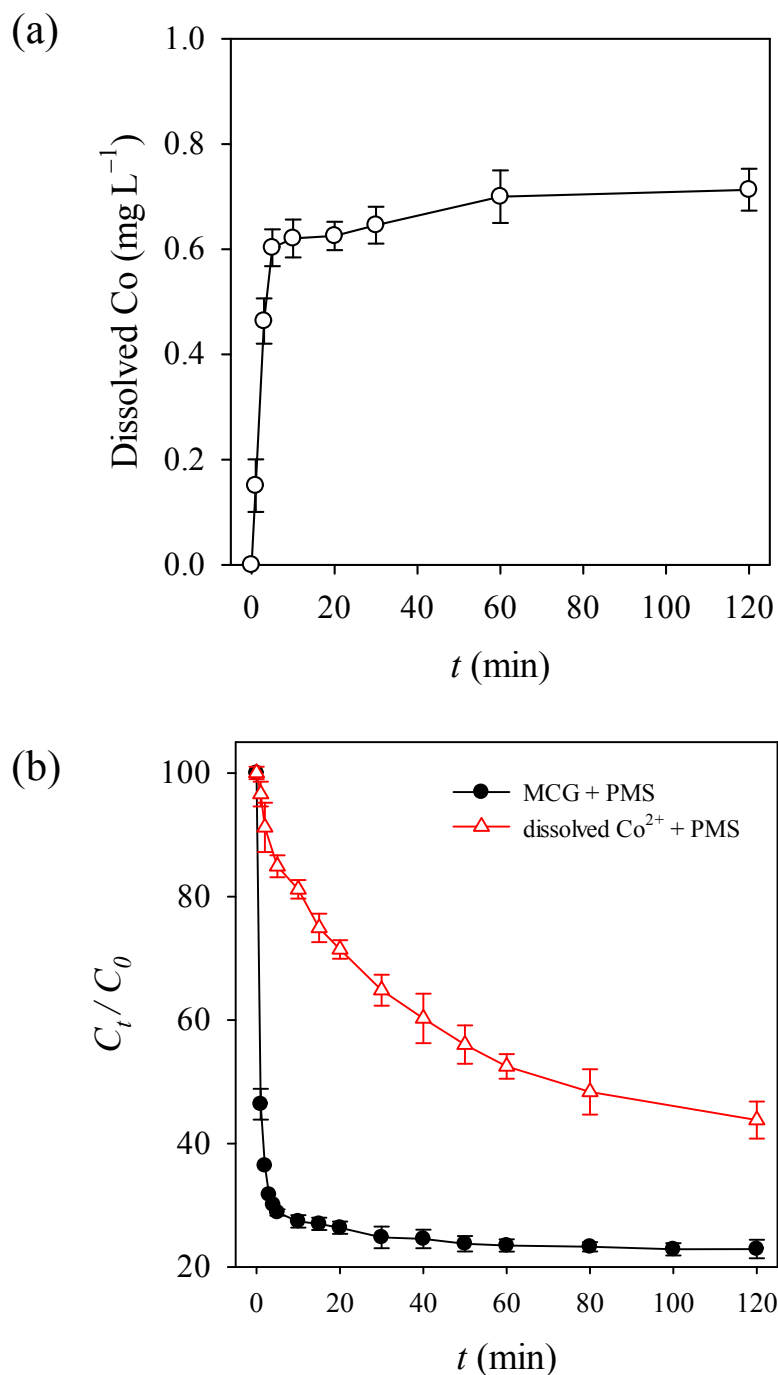

Fig. S6. Cobalt ion leached out from MCG: (a) dissolution of Co ion as a function of time during the decolorization of AY and (b) homogenous activation of PMS by the dissolved Co<sup>2+</sup> (AY solution = 100 mg L<sup>-1</sup>; PMS = 90 mg L<sup>-1</sup>; MCG = 500 mg L<sup>-1</sup>, the dissolved Co<sup>2+</sup> = 0.71 mg L<sup>-1</sup>).

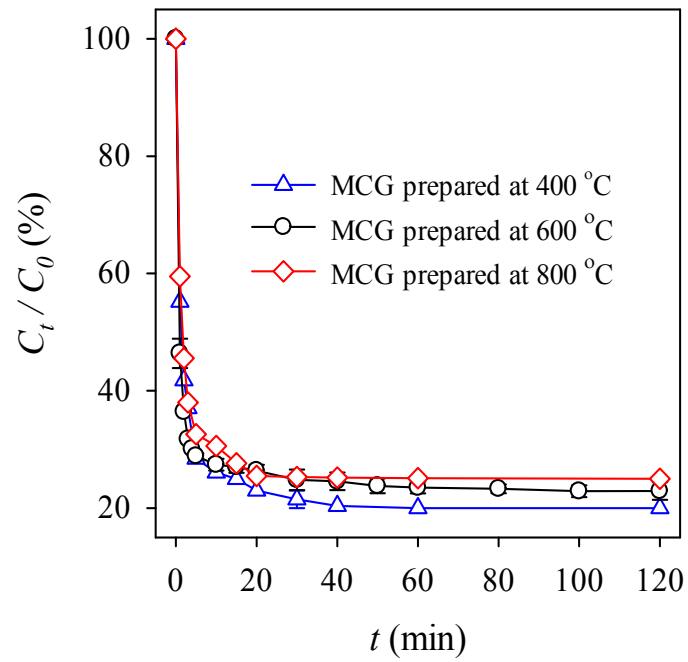

Fig. S7. Effect of carbonization temperature of MCG preparation on the degradation of AY at 25 °C (AY solution = 100 mg L<sup>-1</sup>; PMS = 90 mg L<sup>-1</sup>; MCG = 500 mg L<sup>-1</sup>).



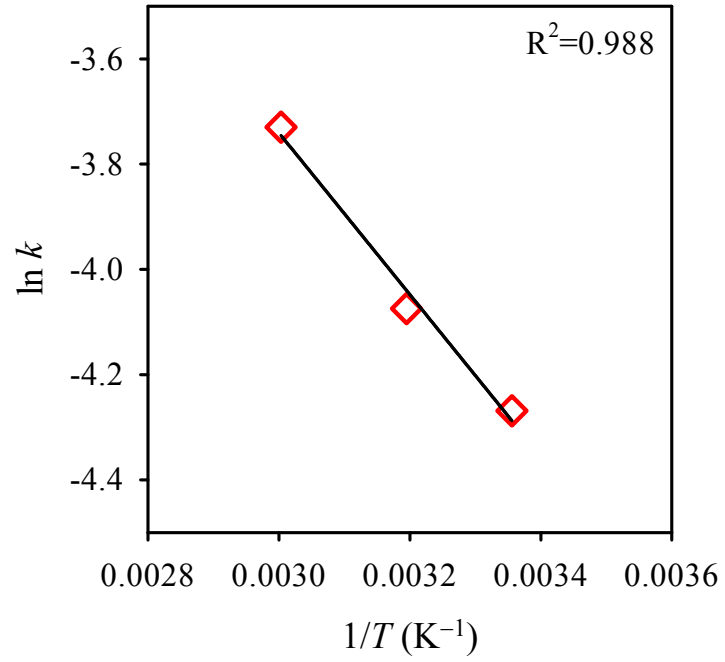

Fig. S8. Arrhenius plot of AY decolorization using PMS activated by MCG.

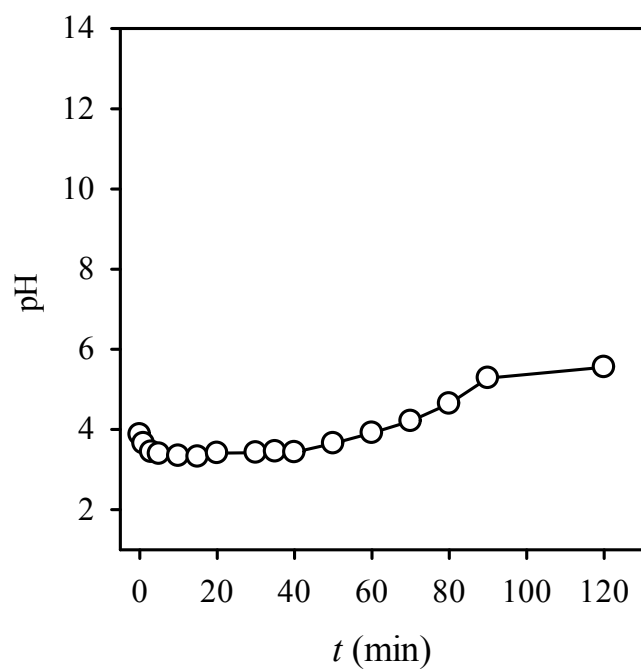

Fig. S9. pH variation during the decolorization of AY using PMS activated by MCG at 25 °C (AY solution = 100 mg L<sup>-1</sup>; PMS = 90 mg L<sup>-1</sup>; MCG = 500 mg L<sup>-1</sup>).

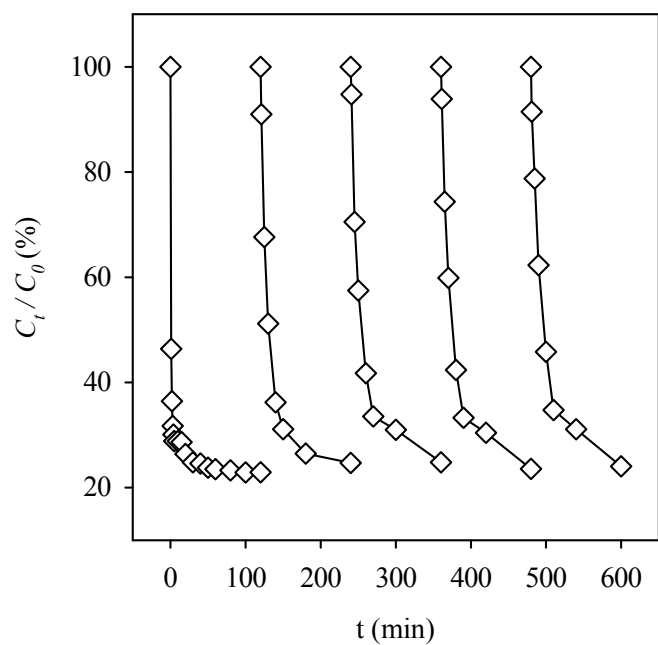

Fig. S10. Stability of MCG for the decolorization of AY at 25 °C (AY solution = 100 mg L<sup>-1</sup>; PMS = 90 mg L<sup>-1</sup>; MCG = 500 mg L<sup>-1</sup>).

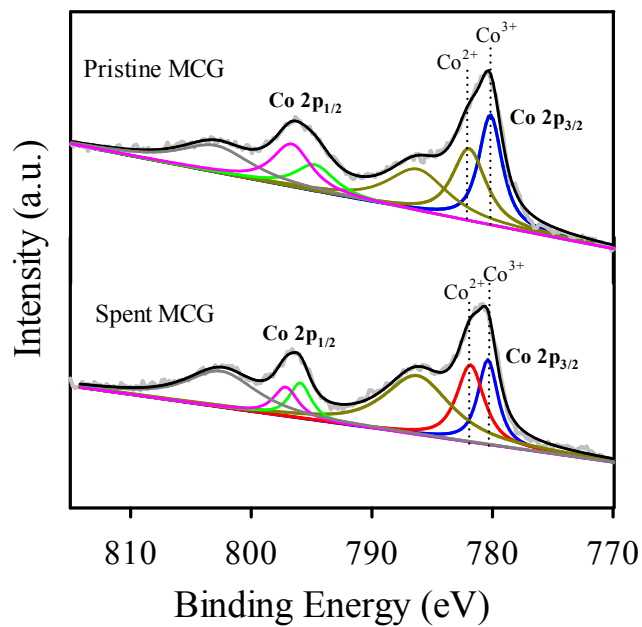

Fig. S11. XPS spectrum of the pristine MCG and the spent MCG recovered from the long-term cyclic decolorization test.

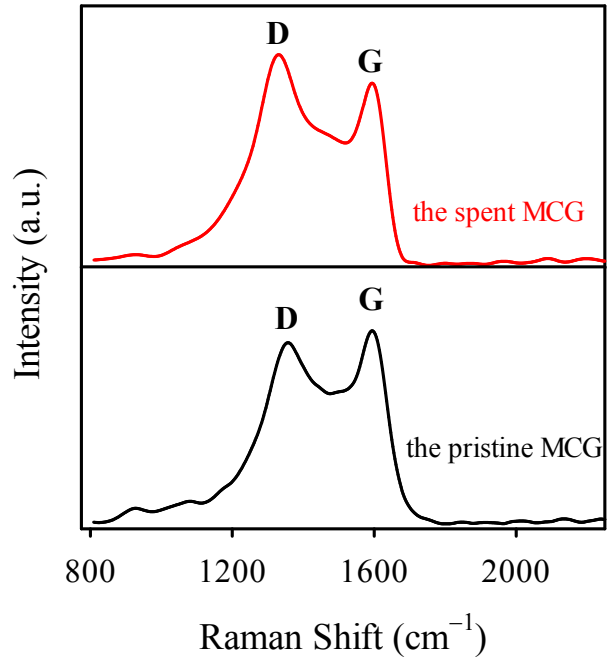

Fig. S12. Raman spectra of the pristine MCG and the MCG recovered from the long-term cyclic decolorization test.

Table S1. Comparisons of MCG with other metal oxides/graphene composites as the PMS activator for degradation of organic pollutants.

| Composite name                                           | Fraction of Metal oxides in the composite <sup>a</sup> | Conc. of pollutants (mg L <sup>-1</sup> ) | Conc. of PMS (mg L <sup>-1</sup> ) | Conc. of Catalyst (mg L <sup>-1</sup> ) | <i>k</i> (min <sup>-1</sup> ) | <i>E<sub>a</sub></i> (kJ mol <sup>-1</sup> ) | T (°C) | Ref.                                |
|----------------------------------------------------------|--------------------------------------------------------|-------------------------------------------|------------------------------------|-----------------------------------------|-------------------------------|----------------------------------------------|--------|-------------------------------------|
| <i>Magnetic Cobalt-Graphene (MCG)</i>                    | Co <sub>3</sub> O <sub>4</sub> 36%                     | Acid Yellow 17 100                        | 90                                 | 500                                     | 0.0119                        | 12.0                                         | 25     | In this study                       |
| <i>Co<sub>3</sub>O<sub>4</sub>-Graphene</i>              | Co <sub>3</sub> O <sub>4</sub> 58%                     | Phenol 20                                 | 2000                               | 67                                      | 0.1                           | 26.5                                         | 25     | Yao <i>et al.</i> <sup>51</sup>     |
| <i>Magnetic MnFe<sub>2</sub>O<sub>4</sub>-Graphene</i>   | MnFe <sub>2</sub> O <sub>4</sub> 64%                   | Orange II 20                              | 500                                | 50                                      | 0.019                         | 25.7                                         | 25     | Yao <i>et al.</i> <sup>52</sup>     |
| <i>Supported Co<sub>3</sub>O<sub>4</sub> on Graphene</i> | Co <sub>3</sub> O <sub>4</sub> 38%                     | Orange II 70                              | 304                                | 100                                     | —                             | —                                            | —      | Shi <i>et al.</i> <sup>49, 68</sup> |

a: the remaining part is carbon-based material (i.e., carbon, graphene)
